# Supplementary material for: Effect of postoperative coffee consumption on gastrointestinal function after abdominal surgery: A systematic review and meta-analysis of randomized controlled trials
Source: PubMed Central journal article supplement (PMC6255780; doi:10.1038/s41598-018-35752-2), 2018-11-26
Supplement: 41598_2018_35752_MOESM1_ESM.pdf [file 41598_2018_35752_MOESM1_ESM.pdf]

## **SUPPLEMENT INFORMATION**

### **Effect of postoperative coffee consumption on gastrointestinal function after abdominal surgery: A systematic review and meta-analysis of randomized controlled trials**

#### **Authors**

Nuntasiri Eamudomkarn<sup>1</sup>, Chumnant Kietpeerakool<sup>1</sup>,  
Srinaree Kaewrudee<sup>1</sup>, Nampet Jampathong<sup>1</sup>,  
Chetta Ngamjarus<sup>2</sup>, Pisake Lumbiganon<sup>1</sup>

#### **Institutions:**

<sup>1</sup>Department of Obstetrics and Gynaecology, Faculty of Medicine

<sup>2</sup>Department of Epidemiology and Biostatistics, Faculty of Public Health

Khon Kaen University, Khon Kaen, Thailand

## **Supplement 1**

MEDLINE search strategy (via OVID)

1. Caffeine/ or caffeine.mp. (26526)
2. exp Gastrointestinal Motility/
3. exp Intestinal Obstruction/ or exp Intestinal Pseudo-Obstruction/ or exp Ileus/ or exp Duodenal Obstruction/
4. exp Gastrointestinal Transit/
5. exp Peristalsis/
6. exp Auscultation/
7. exp Ileus/
8. exp Flatulence/
9. ileus\$.tw.
10. bowel\$ function\$.tw.
11. (intestin\$ adj5 pseudo-obstruct\$).tw.
12. ((postoperative or post-operative) adj5 recover\$).tw.
13. ((gastro-intestinal or gastrointestinal) adj5 function\$).tw.
14. ((gastrointestinal or gastro-intestinal) adj5 dysmotilit\$).tw.
15. ((gastrointestinal or gastro-intestinal) adj5 motilit\$).tw.
16. ((gastrointestinal or gastro-intestinal) adj5 transit\$).tw.
17. ((duoden\$ or intestin\$) adj5 obstruct\$).tw.
18. (gut adj5 (motilit\$ or dysmotilit\$ or transit\$)).tw.
19. (colorect\$ or intestin\$ or colectom\$ or ileostom\$ or colonic\$ or gynecologic\$ or gynaecolog\$ or auscultation\$ or peristalsis).tw.
20. ((postoperative or post-operative) adj5 ileus).tw.
21. (bowel adj5 (motilit\$ or dysmotilit\$ or transit\$)).ti,ab.
22. (colon adj5 (motilit\$ or dysmotilit\$ or transit\$)).ti,ab.
23. 2 or 3 or 4 or 5 or 6 or 7 or 8 or 9 or 10 or 11 or 12 or 13 or 14 or 15 or 16 or 17 or 18 or 19 or 20 or 21 or 22
24. 1 and 23
25. randomized controlled trial.pt.
26. controlled clinical trial.pt.
27. randomized.ab.
28. drug therapy.fs.
29. randomly.ab. (199356)
30. groups.ab. (1275406)
31. 25 or 26 or 27 or 28 or 29 or 30
32. 24 and 31

**Table Supplement 1**  
**Characteristics of included studies**

|                                                                                                              |                                                                                                                                                                                                                                                                                                                                                                                            |                                                                                   |
|--------------------------------------------------------------------------------------------------------------|--------------------------------------------------------------------------------------------------------------------------------------------------------------------------------------------------------------------------------------------------------------------------------------------------------------------------------------------------------------------------------------------|-----------------------------------------------------------------------------------|
| <b>Study 1</b>                                                                                               |                                                                                                                                                                                                                                                                                                                                                                                            |                                                                                   |
| Title: Randomized clinical trial on the effect of coffee on postoperative ileus following elective colectomy |                                                                                                                                                                                                                                                                                                                                                                                            |                                                                                   |
| Authors: Muller SA, Rahbari NN, Schneider F, Warschkow R, Simon T, von Frankenberg M, et al.                 |                                                                                                                                                                                                                                                                                                                                                                                            |                                                                                   |
| Source: Br J Surg 2012;99(11):1530-8                                                                         |                                                                                                                                                                                                                                                                                                                                                                                            |                                                                                   |
| Methods                                                                                                      | Randomized controlled trial                                                                                                                                                                                                                                                                                                                                                                |                                                                                   |
| Participants                                                                                                 | <p>Sample size: 80 patients</p> <p>Exclusion criteria:</p> <ul style="list-style-type: none"> <li>- Rectal resection was intended, a stoma was required or multivisceral resection was planned</li> <li>- Hypersensitivity or distaste for coffee</li> <li>- Expected lack of compliance</li> <li>- Impaired mental state</li> <li>- Intended colonic surgery was not performed</li> </ul> |                                                                                   |
| Surgical procedure                                                                                           | Elective open or laparoscopic colonic resection for malignant or benign diseases                                                                                                                                                                                                                                                                                                           |                                                                                   |
| Interventions                                                                                                | <p>Intervention: three cups of coffee (100 ml) given at 08.00 12.00 and 16.00 hours), beginning on the morning after surgery</p> <p>Control: warm water</p>                                                                                                                                                                                                                                |                                                                                   |
| Outcomes                                                                                                     | <p>Primary outcome:</p> <ul style="list-style-type: none"> <li>- Time to first defecation</li> </ul> <p>Secondary outcomes:</p> <ul style="list-style-type: none"> <li>- Time to first flatus</li> <li>- Time to tolerance of solid food</li> <li>- Need for additional laxatives</li> <li>- Safety</li> <li>- Length of hospital stay</li> </ul>                                          |                                                                                   |
| <b>Risk of bias assessment</b>                                                                               |                                                                                                                                                                                                                                                                                                                                                                                            |                                                                                   |
| Bias                                                                                                         | Authors' judgement                                                                                                                                                                                                                                                                                                                                                                         | Support for judgement                                                             |
| Random sequence generation (selection bias)                                                                  | Low risk                                                                                                                                                                                                                                                                                                                                                                                   | Authors used randomizer software (SAS version 9.1) for random sequence generation |
| Allocation concealment (selection bias)                                                                      | Low risk                                                                                                                                                                                                                                                                                                                                                                                   | Authors concealed allocation by sequentially numbered, opaque, sealed envelopes   |
| Blinding of participants and personnel (performance bias) All outcomes                                       | High risk                                                                                                                                                                                                                                                                                                                                                                                  | No blinding                                                                       |
| Blinding of outcome assessment (detection bias) All outcomes                                                 | Unclear risk                                                                                                                                                                                                                                                                                                                                                                               | No information available                                                          |

|                                                                                                                                                                                                                                                                                   |                                                                                                                                                                                                                                                                                                                      |                                                               |
|-----------------------------------------------------------------------------------------------------------------------------------------------------------------------------------------------------------------------------------------------------------------------------------|----------------------------------------------------------------------------------------------------------------------------------------------------------------------------------------------------------------------------------------------------------------------------------------------------------------------|---------------------------------------------------------------|
| Incomplete outcome data (attrition bias)<br>All outcomes                                                                                                                                                                                                                          | Low risk                                                                                                                                                                                                                                                                                                             | All outcomes were measured during postoperative hospital stay |
| Selective reporting (reporting bias)                                                                                                                                                                                                                                              | Low risk                                                                                                                                                                                                                                                                                                             | All outcomes of interest reported                             |
| Other bias                                                                                                                                                                                                                                                                        | Low risk                                                                                                                                                                                                                                                                                                             | Study appeared free of other sources of bias                  |
| <b>Study 2</b>                                                                                                                                                                                                                                                                    |                                                                                                                                                                                                                                                                                                                      |                                                               |
| Title: Effect of coffee on the length of postoperative ileus after elective laparoscopic left-sided colectomy: a randomized, prospective single-center study<br>Authors: Dulskas A, Klimovskij M, Vitkauskiene M, Samalavicius NE.<br>Source: Dis Colon Rectum 2015;58(11):1064-9 |                                                                                                                                                                                                                                                                                                                      |                                                               |
| Methods                                                                                                                                                                                                                                                                           | Randomized controlled trial                                                                                                                                                                                                                                                                                          |                                                               |
| Participants                                                                                                                                                                                                                                                                      | Sample size: 105 patients<br>Exclusion criteria:<br><ul style="list-style-type: none"> <li>- A stoma was required or multivisceral resection was planned</li> <li>- Hypersensitivity or distaste for coffee</li> <li>- Expected lack of compliance</li> <li>- Impaired mental state</li> </ul>                       |                                                               |
| Surgical procedure                                                                                                                                                                                                                                                                | Elective laparoscopic left-sided colonic resection for malignant diseases                                                                                                                                                                                                                                            |                                                               |
| Interventions                                                                                                                                                                                                                                                                     | Three groups<br>Group 1: three cups of coffee with caffeine daily (100 ml at 08.00 12.00 and 16.00 hours), beginning on the morning after surgery<br><br>Group 2: 3 cups of coffee without caffeine daily (100 ml at 08.00 12.00 and 16.00 hours), beginning on the morning after surgery<br><br>Group 3: warm water |                                                               |
| Outcomes                                                                                                                                                                                                                                                                          | Primary outcome:<br><ul style="list-style-type: none"> <li>- Time to first defecation</li> </ul> Secondary outcomes:<br><ul style="list-style-type: none"> <li>- Time to first flatus</li> <li>- Time to tolerance of solid food</li> <li>- Length of hospital stay</li> </ul>                                       |                                                               |
| <b>Risk of bias</b>                                                                                                                                                                                                                                                               |                                                                                                                                                                                                                                                                                                                      |                                                               |
| Bias                                                                                                                                                                                                                                                                              | Authors' judgement                                                                                                                                                                                                                                                                                                   | Support for judgement                                         |
| Random sequence generation (selection bias)                                                                                                                                                                                                                                       | Unclear risk                                                                                                                                                                                                                                                                                                         | No data available                                             |

|                                                                           |           |                                                               |
|---------------------------------------------------------------------------|-----------|---------------------------------------------------------------|
| Allocation concealment (selection bias)                                   | Low risk  | Simple envelop method                                         |
| Blinding of participants and personnel (performance bias)<br>All outcomes | High risk | No blinding                                                   |
| Blinding of outcome assessment (detection bias)<br>All outcomes           | Low risk  | Recorded by a nurse blinded to the intervention allocated     |
| Incomplete outcome data (attrition bias)<br>All outcomes                  | Low risk  | All outcomes were measured during postoperative hospital stay |
| Selective reporting (reporting bias)                                      | Low risk  | All outcomes of interest reported                             |
| Other bias                                                                | Low risk  | Study appeared free of other sources of bias                  |

### **Study 3**

Title: Effects of coffee consumption on gut recovery after surgery of gynecological cancer patients: a randomized controlled trial

Authors: Gungorduk K, Ozdemir IA, Gungorduk O, Gulseren V, Gokcu M, Sancı M.

Source: Am J Obstet Gynecol 2017;216(2):145 e1- e7

|                    |                                                                                                                                                                                                                                                                                                                                                                                                                                                                                                                                                                                                                                                                                                                                                                                                                                                                                  |
|--------------------|----------------------------------------------------------------------------------------------------------------------------------------------------------------------------------------------------------------------------------------------------------------------------------------------------------------------------------------------------------------------------------------------------------------------------------------------------------------------------------------------------------------------------------------------------------------------------------------------------------------------------------------------------------------------------------------------------------------------------------------------------------------------------------------------------------------------------------------------------------------------------------|
| Methods            | Randomized controlled trial                                                                                                                                                                                                                                                                                                                                                                                                                                                                                                                                                                                                                                                                                                                                                                                                                                                      |
| Participants       | <p>Sample size: 118 patients</p> <p>Exclusion criteria:</p> <ul style="list-style-type: none"> <li>- Hypersensitivity or allergy to caffeine/ coffee</li> <li>- Thyroid disease</li> <li>- Inflammatory bowel disease</li> <li>- Compromised liver function</li> <li>- Clinically significant cardiac arrhythmia</li> <li>- Chronic constipation (defined as 2 bowel movements per week)</li> <li>- History of abdominal bowel surgery</li> <li>- Previous abdominal irradiation</li> <li>- Previous neoadjuvant chemotherapy or hyperthermic intraperitoneal chemotherapy</li> <li>- A need for intensive care for &gt;24 hours postoperatively</li> <li>- A need for nasogastric tube drainage beyond the first postoperative morning</li> <li>- A bowel anastomosis</li> <li>- The use of an upper abdominal multivisceral surgical approach for debulking surgery</li> </ul> |
| Surgical procedure | Comprehensive staging surgery (abdominal hysterectomy and systematic pelvic and paraaortic lymphadenectomy) in whom diagnosis of cervical, endometrial or ovarian cancer                                                                                                                                                                                                                                                                                                                                                                                                                                                                                                                                                                                                                                                                                                         |
| Interventions      | Intervention: three cups of caffeinated coffee daily (100 ml at 10.00 15.00 and 19.00 hours), beginning on the morning after surgery                                                                                                                                                                                                                                                                                                                                                                                                                                                                                                                                                                                                                                                                                                                                             |

|                                                                                                                                                                                                                                                            |                                                                                                                                                                                                                                                                                      |                                                                        |
|------------------------------------------------------------------------------------------------------------------------------------------------------------------------------------------------------------------------------------------------------------|--------------------------------------------------------------------------------------------------------------------------------------------------------------------------------------------------------------------------------------------------------------------------------------|------------------------------------------------------------------------|
|                                                                                                                                                                                                                                                            | Control: no intervention                                                                                                                                                                                                                                                             |                                                                        |
| Outcomes                                                                                                                                                                                                                                                   | Primary outcome:<br>- Time to first flatus<br>Secondary outcomes:<br>- Time to first defecation<br>- Time to first bowel sound<br>- Time to tolerance of solid food<br>- Side effects of coffee intake<br>- Postoperative paralytic ileus type and rate<br>- Length of hospital stay |                                                                        |
| <b>Risk of bias</b>                                                                                                                                                                                                                                        |                                                                                                                                                                                                                                                                                      |                                                                        |
| Bias                                                                                                                                                                                                                                                       | Authors' judgement                                                                                                                                                                                                                                                                   | Support for judgement                                                  |
| Random sequence generation (selection bias)                                                                                                                                                                                                                | Low risk                                                                                                                                                                                                                                                                             | Authors used computer-generated code for running a block randomization |
| Allocation concealment (selection bias)                                                                                                                                                                                                                    | Low risk                                                                                                                                                                                                                                                                             | Simple envelop method                                                  |
| Blinding of participants and personnel (performance bias)<br>All outcomes                                                                                                                                                                                  | High risk                                                                                                                                                                                                                                                                            | No blinding                                                            |
| Blinding of outcome assessment (detection bias)<br>All outcomes                                                                                                                                                                                            | Low risk                                                                                                                                                                                                                                                                             | The evaluator was blinded to the study allocation                      |
| Incomplete outcome data (attrition bias)<br>All outcomes                                                                                                                                                                                                   | Low risk                                                                                                                                                                                                                                                                             | All outcomes were measured during postoperative hospital stay          |
| Selective reporting (reporting bias)                                                                                                                                                                                                                       | Low risk                                                                                                                                                                                                                                                                             | All outcomes of interest reported                                      |
| Other bias                                                                                                                                                                                                                                                 | Low risk                                                                                                                                                                                                                                                                             | Study appeared free of other sources of bias                           |
| <b>Study 4</b><br>Title: Effect of gum chewing and coffee consumption on intestinal motility in caesarean sections.<br>Authors: Göymen A, Şimşek Y, Özkaplan ŞE, Özdurak Hİ, Akpak YK, Semiz A, et al.<br>Source: J Clin Anal Med. 2016.DOI: 10.4328/JCAM. |                                                                                                                                                                                                                                                                                      |                                                                        |
| Methods                                                                                                                                                                                                                                                    | Randomized controlled trial                                                                                                                                                                                                                                                          |                                                                        |
| Participants                                                                                                                                                                                                                                               | Sample size: 100 pregnant patients<br>Exclusion criteria:<br>- Preterm labour<br>- Multiple pregnancies<br>- Premature rupture of membranes<br>- Emergency caesarean section                                                                                                         |                                                                        |

|                                                                           |                                                                                                                                                                                                                                                                                                                                                                                                                         |                                                                                                     |
|---------------------------------------------------------------------------|-------------------------------------------------------------------------------------------------------------------------------------------------------------------------------------------------------------------------------------------------------------------------------------------------------------------------------------------------------------------------------------------------------------------------|-----------------------------------------------------------------------------------------------------|
|                                                                           | <ul style="list-style-type: none"> <li>- Body temperature above 38°C</li> <li>- Severe anaemia</li> <li>- History of abdominal surgery other than caesarean section</li> <li>- Allergic reaction to the agents used</li> <li>- Inability to chew gum</li> </ul>                                                                                                                                                         |                                                                                                     |
| Surgical procedure                                                        | Elective caesarean section in pregnant patients with completion of gestational week 37                                                                                                                                                                                                                                                                                                                                  |                                                                                                     |
| Interventions                                                             | <p>Four groups</p> <p>Group 1: sugar-free gum at 4 hours intervals after postoperative hour 2 until first defecation</p> <p>Group 2: 100 ml coffee at 4 hours intervals beginning from postoperative hour 2 until defecation for three times a day</p> <p>Group 3: 100 ml hot water at 4 hours intervals beginning from postoperative hour 2 until defecation for three times a day</p> <p>Group 4: No intervention</p> |                                                                                                     |
| Outcomes                                                                  | <ul style="list-style-type: none"> <li>- Time to first bowel sound</li> <li>- Time to first flatus</li> <li>- Time to first defecation</li> </ul>                                                                                                                                                                                                                                                                       |                                                                                                     |
| <b>Risk of bias</b>                                                       |                                                                                                                                                                                                                                                                                                                                                                                                                         |                                                                                                     |
| Bias                                                                      | Authors' judgement                                                                                                                                                                                                                                                                                                                                                                                                      | Support for judgement                                                                               |
| Random sequence generation (selection bias)                               | Low risk                                                                                                                                                                                                                                                                                                                                                                                                                | Authors used a simple randomization method with the aid of a computer                               |
| Allocation concealment (selection bias)                                   | Unclear risk                                                                                                                                                                                                                                                                                                                                                                                                            | No information provided                                                                             |
| Blinding of participants and personnel (performance bias)<br>All outcomes | High risk                                                                                                                                                                                                                                                                                                                                                                                                               | No blinding                                                                                         |
| Blinding of outcome assessment (detection bias)<br>All outcomes           | Unclear risk                                                                                                                                                                                                                                                                                                                                                                                                            | The research assistant evaluated outcome, but no information about blinding the assistant available |
| Incomplete outcome data (attrition bias)<br>All outcomes                  | Low risk                                                                                                                                                                                                                                                                                                                                                                                                                | All outcomes were measured during postoperative hospital stay                                       |
| Selective reporting (reporting bias)                                      | Low risk                                                                                                                                                                                                                                                                                                                                                                                                                | All outcomes of interest reported                                                                   |
| Other bias                                                                | Low risk                                                                                                                                                                                                                                                                                                                                                                                                                | Study appeared free of other sources of bias                                                        |

**Study 5**

Title: Does coffee affect the bowel function after caesarean section?

Authors: Rabiipoor S, Yas A, Navaei J, Khalkhali HR.

Source: Eur J Obstet Gynecol Reprod Biol 2018;220:96-9

|                                                                           |                                                                                                                                                                                                                                                                |                                                                |
|---------------------------------------------------------------------------|----------------------------------------------------------------------------------------------------------------------------------------------------------------------------------------------------------------------------------------------------------------|----------------------------------------------------------------|
| Methods                                                                   | Randomized controlled trial                                                                                                                                                                                                                                    |                                                                |
| Participants                                                              | Sample size: 100 patients<br>Exclusion criteria: <ul style="list-style-type: none"> <li>- Gastrointestinal complications</li> <li>- Respiratory problems and infections that required medicinal interventions</li> <li>- Surgery longer than 90 min</li> </ul> |                                                                |
| Surgical procedure                                                        | Elective caesarean section                                                                                                                                                                                                                                     |                                                                |
| Interventions                                                             | Intervention: three cups of 100cc sugar-free coffee at 8, 12 and 20 hr after the surgery<br>Control: 100cc hot water at the same intervals                                                                                                                     |                                                                |
| Outcomes                                                                  | <ul style="list-style-type: none"> <li>- Time to first bowel sound</li> <li>- Time to first flatus</li> <li>- Time to first defecation</li> <li>- Length of hospital stay</li> </ul>                                                                           |                                                                |
| <b>Risk of bias</b>                                                       |                                                                                                                                                                                                                                                                |                                                                |
| Bias                                                                      | Authors' judgement                                                                                                                                                                                                                                             | Support for judgement                                          |
| Random sequence generation (selection bias)                               | Unclear risk                                                                                                                                                                                                                                                   | Insufficient information about the sequence generation process |
| Allocation concealment (selection bias)                                   | Low risk                                                                                                                                                                                                                                                       | Simple envelop method                                          |
| Blinding of participants and personnel (performance bias)<br>All outcomes | High risk                                                                                                                                                                                                                                                      | No blinding                                                    |
| Blinding of outcome assessment (detection bias)<br>All outcomes           | Unclear risk                                                                                                                                                                                                                                                   | No information available                                       |
| Incomplete outcome data (attrition bias)<br>All outcomes                  | Low risk                                                                                                                                                                                                                                                       | All outcomes were measured during postoperative hospital stay  |
| Selective reporting (reporting bias)                                      | Low risk                                                                                                                                                                                                                                                       | All outcomes of interest reported                              |
| Other bias                                                                | Low risk                                                                                                                                                                                                                                                       | Study appeared free of other sources of bias                   |



**Study 6**

Title: Immediate postoperative coffee consumption stimulates early gut recovery after cesarean section

Author: Mohamed Farag El Sherbany

Source: [www.semanticscholar.org](http://www.semanticscholar.org) (available at

<https://pdfs.semanticscholar.org/8b79/0eb67f979bea8affae03fe5010167ae166c0.pdf>,

Accessed October 2, 2018)

|                                             |                                                                                                                                                                                                                                                                                                                                                                                                                                                                                                                                                                                                                                                                                                                                                                  |                                                                        |
|---------------------------------------------|------------------------------------------------------------------------------------------------------------------------------------------------------------------------------------------------------------------------------------------------------------------------------------------------------------------------------------------------------------------------------------------------------------------------------------------------------------------------------------------------------------------------------------------------------------------------------------------------------------------------------------------------------------------------------------------------------------------------------------------------------------------|------------------------------------------------------------------------|
| Methods                                     | Randomized controlled trial                                                                                                                                                                                                                                                                                                                                                                                                                                                                                                                                                                                                                                                                                                                                      |                                                                        |
| Participants                                | <p>Sample size: 210 patients</p> <p>Exclusion criteria:</p> <ul style="list-style-type: none"> <li>- Pre-existing bowel disease</li> <li>- History of prior abdominal bowel surgery</li> <li>- History of prior upper or lower abdominal exploration</li> <li>- Clinically significant cardiac arrhythmia</li> <li>- Chronic constipation (defined as <math>\leq 2</math> bowel movements per week)</li> <li>- Any known hypersensitivity or allergy to caffeine/ coffee</li> <li>- Need for intensive care for &gt; 24 hours</li> <li>- Need for nasogastric tube drainage or need for surgery other than CS as cesarean hysterectomy or extensive intra-abdominal surgery as a result of intraoperative complications</li> <li>- Distaste of coffee</li> </ul> |                                                                        |
| Surgical procedure                          | Elective caesarean section                                                                                                                                                                                                                                                                                                                                                                                                                                                                                                                                                                                                                                                                                                                                       |                                                                        |
| Interventions                               | <p>Intervention: four cups of 100 ml of coffee, every 4 hours during daytime, beginning immediate postoperatively as soon as the patient could do and continued up to first bowel motion either flatus or defecation</p> <p>Control: no intervention</p>                                                                                                                                                                                                                                                                                                                                                                                                                                                                                                         |                                                                        |
| Outcomes                                    | <p>Primary outcome:</p> <ul style="list-style-type: none"> <li>- Time to first flatus</li> </ul> <p>Secondary outcomes:</p> <ul style="list-style-type: none"> <li>- Time to first defecation</li> <li>- Time to first bowel sound</li> <li>- Time to tolerance of solid food</li> <li>- Side effects of coffee intake</li> <li>- Length of hospital stay</li> </ul>                                                                                                                                                                                                                                                                                                                                                                                             |                                                                        |
| <b>Risk of bias</b>                         |                                                                                                                                                                                                                                                                                                                                                                                                                                                                                                                                                                                                                                                                                                                                                                  |                                                                        |
| Bias                                        | Authors' judgement                                                                                                                                                                                                                                                                                                                                                                                                                                                                                                                                                                                                                                                                                                                                               | Support for judgement                                                  |
| Random sequence generation (selection bias) | Low risk                                                                                                                                                                                                                                                                                                                                                                                                                                                                                                                                                                                                                                                                                                                                                         | Authors used computer – generated code running a blocked randomization |

|                                                                           |              |                                                                                 |
|---------------------------------------------------------------------------|--------------|---------------------------------------------------------------------------------|
| Allocation concealment (selection bias)                                   | Low risk     | Authors concealed allocation by sequentially numbered, opaque, sealed envelopes |
| Blinding of participants and personnel (performance bias)<br>All outcomes | High risk    | No blinding                                                                     |
| Blinding of outcome assessment (detection bias)<br>All outcomes           | Unclear risk | No information available                                                        |
| Incomplete outcome data (attrition bias)<br>All outcomes                  | Low risk     | All outcomes were measured during postoperative hospital stay                   |
| Selective reporting (reporting bias)                                      | Low risk     | All outcomes of interest reported                                               |
| Other bias                                                                | Low risk     | Study appeared free of other sources of bias                                    |

**Table Supplement 2**  
**Characteristics of ongoing studies**

|                                                                  |                                                                                                                                                                                                                                                                                                                                                     |
|------------------------------------------------------------------|-----------------------------------------------------------------------------------------------------------------------------------------------------------------------------------------------------------------------------------------------------------------------------------------------------------------------------------------------------|
| <b>Ongoing study 1</b><br><b>Contact author: Fernando Aguila</b> |                                                                                                                                                                                                                                                                                                                                                     |
| Methods                                                          | Randomized controlled trial                                                                                                                                                                                                                                                                                                                         |
| Participants                                                     | Sample size: 120 patients<br>Exclusion criteria: <ul style="list-style-type: none"> <li>- Patient with atrial fibrillation who is considered a non-coffee drinker (drinks coffee less than 3 days per week over the last 4 weeks)</li> <li>- Patients undergoing colon resection without removal of any portion of small bowel</li> </ul>           |
| Surgical procedure                                               | Elective, urgent or emergent small bowel resection                                                                                                                                                                                                                                                                                                  |
| Interventions                                                    | Intervention: 100 ml of coffee administered 3 times per day until return to bowel function has been established<br>Control: 100 cc of warm water administered 3 times per day until return to bowel function has been established                                                                                                                   |
| Outcomes                                                         | Primary outcome: <ul style="list-style-type: none"> <li>- Time to removal of nasogastric tube</li> </ul> Secondary outcomes: <ul style="list-style-type: none"> <li>- Time to return of bowel function (first flatus or bowel movement)</li> <li>- Length of hospital stay</li> </ul>                                                               |
| The most update status                                           | Recruiting participants                                                                                                                                                                                                                                                                                                                             |
| Trial registration number                                        | ClinicalTrials.gov Identifier: NCT03143621                                                                                                                                                                                                                                                                                                          |
| <b>Ongoing study 2</b><br><b>Contact author: Gehrer Simone</b>   |                                                                                                                                                                                                                                                                                                                                                     |
| Methods                                                          | RCT                                                                                                                                                                                                                                                                                                                                                 |
| Participants                                                     | 136 patients<br>Exclusion criteria: <ul style="list-style-type: none"> <li>- Participation in other studies</li> <li>- Additional small bowel anastomosis</li> <li>- Need for extended adhesiolysis</li> <li>- Need for a stoma (e.g. protective ileostomy)</li> <li>- Emergency operation with diffuse peritonitis or preexisting ileus</li> </ul> |

|                                                        |                                                                                                                                                                                                                                                                                                                                                                                                                                                         |
|--------------------------------------------------------|---------------------------------------------------------------------------------------------------------------------------------------------------------------------------------------------------------------------------------------------------------------------------------------------------------------------------------------------------------------------------------------------------------------------------------------------------------|
|                                                        | <ul style="list-style-type: none"> <li>- Preoperative radiation</li> <li>- Known hypersensitivity or allergy to coffee</li> <li>- Expected lack of compliance</li> <li>- Impaired mental state or language problems</li> </ul>                                                                                                                                                                                                                          |
| Surgical procedure                                     | Elective laparoscopic or open colorectal surgery due to benign or malignant colorectal disease, which need a large bowel resection with primary anastomosis                                                                                                                                                                                                                                                                                             |
| Interventions                                          | 2 groups<br>Treatment: coffee<br>Control: water/tea (excluding black tea)                                                                                                                                                                                                                                                                                                                                                                               |
| Outcomes                                               | Time to first defecation                                                                                                                                                                                                                                                                                                                                                                                                                                |
| The most update status                                 | Completed recruitment                                                                                                                                                                                                                                                                                                                                                                                                                                   |
| Trial registration number                              | ClinicalTrials.gov Identifier: NCT02469441                                                                                                                                                                                                                                                                                                                                                                                                              |
| <b>Ongoing study 3<br/>University of Massachusetts</b> |                                                                                                                                                                                                                                                                                                                                                                                                                                                         |
| Methods                                                | RCT                                                                                                                                                                                                                                                                                                                                                                                                                                                     |
| Participants                                           | 44 patients<br>Exclusion criteria: <ul style="list-style-type: none"> <li>- Total colectomy</li> <li>- Colostomy</li> <li>- Ileostomy</li> <li>- Reversal of a stoma or synchronous resection</li> <li>- Complete small or large bowel obstruction</li> <li>- Scheduled to receive other treatments or techniques to reduce ileus (epidural anesthetic techniques)</li> <li>- Nasogastric tube for any length of time in the post-op period.</li> </ul> |
| Surgical procedure                                     | Laparoscopic or laparotomic elective partial bowel resection with primary anastomosis for either cancer or benign disease                                                                                                                                                                                                                                                                                                                               |
| Interventions                                          | 2 groups<br>Treatment: 8 oz. of caffeinated coffee/breakfast & noon meal<br>Control: no intervention                                                                                                                                                                                                                                                                                                                                                    |
| Outcomes                                               | <ul style="list-style-type: none"> <li>- Time to first flatus</li> <li>- Time to first bowel sound</li> <li>- Time to tolerance of solid food</li> </ul>                                                                                                                                                                                                                                                                                                |

|                                                                |                                                                                                                                                                                                                                                                                                                                                                                                                                                                                                                                                                                                                                                                                                                                                                                                                                                                                                                                                                                                                       |
|----------------------------------------------------------------|-----------------------------------------------------------------------------------------------------------------------------------------------------------------------------------------------------------------------------------------------------------------------------------------------------------------------------------------------------------------------------------------------------------------------------------------------------------------------------------------------------------------------------------------------------------------------------------------------------------------------------------------------------------------------------------------------------------------------------------------------------------------------------------------------------------------------------------------------------------------------------------------------------------------------------------------------------------------------------------------------------------------------|
| The most update status                                         | Completed recruitment                                                                                                                                                                                                                                                                                                                                                                                                                                                                                                                                                                                                                                                                                                                                                                                                                                                                                                                                                                                                 |
| Trial registration number                                      | ClinicalTrials.gov Identifier: NCT01130675                                                                                                                                                                                                                                                                                                                                                                                                                                                                                                                                                                                                                                                                                                                                                                                                                                                                                                                                                                            |
| <b>Ongoing study 4</b><br><b>Contact author: Yosef Nasseri</b> |                                                                                                                                                                                                                                                                                                                                                                                                                                                                                                                                                                                                                                                                                                                                                                                                                                                                                                                                                                                                                       |
| Methods                                                        | RCT                                                                                                                                                                                                                                                                                                                                                                                                                                                                                                                                                                                                                                                                                                                                                                                                                                                                                                                                                                                                                   |
| Participants                                                   | <p>300 patients</p> <p>Exclusion criteria:</p> <ul style="list-style-type: none"> <li>- Patients with a history of prior intestinal surgery, excluding appendectomy.</li> <li>- Patients who require an ostomy during their elective colorectal surgery.</li> <li>- Patients who require postoperative ventilation, pressures, or ICU stay.</li> <li>- Those who are mentally incompetent, unable, or unwilling to provide informed consent or comply with study procedures.</li> <li>- American Society of Anesthesiologist (ASA) class IV or V.</li> <li>- Those with a history of carcinomatosis.</li> <li>- Those with a history of radiation enteritis.</li> <li>- Women who are pregnant.</li> <li>- Patients who have a history of epilepsy.</li> <li>- Patients with prior cardiovascular disorders including uncontrolled hypertension, prior myocardial infarction, or heart failure.</li> <li>- Patients with peptic ulcers.</li> <li>- Patients with glaucoma.</li> <li>- Non-English Speakers</li> </ul> |
| Surgical procedure                                             | Small and/or large partial bowel resection via laparotomy or laparoscopy with primary anastomosis                                                                                                                                                                                                                                                                                                                                                                                                                                                                                                                                                                                                                                                                                                                                                                                                                                                                                                                     |
| Interventions                                                  | <p>Three groups</p> <p><b>Group A:</b> Regular coffee<br/>4oz cup of coffee, three times daily (at 8:00, 12:00, and 16:00 hours)<br/>Duration of experimental treatment will last until first flatus or bowel movement or 7 days, whichever comes first.</p> <p><b>Group B:</b> Decaffeinated coffee<br/>4oz cup of decaffeinated coffee, three times daily (at 8:00, 12:00, and 16:00 hours)<br/>Duration of experimental treatment will last until first flatus or</p>                                                                                                                                                                                                                                                                                                                                                                                                                                                                                                                                              |

|                           |                                                                                                                                                                                                                                                                                                                                                                        |
|---------------------------|------------------------------------------------------------------------------------------------------------------------------------------------------------------------------------------------------------------------------------------------------------------------------------------------------------------------------------------------------------------------|
|                           | <p>bowel movement or 7 days, whichever comes first.</p> <p><b>Group C:</b> Warm water<br/>4oz cup of warm water, three times daily (at 8:00, 12:00, and 16:00 hours)</p> <p>Duration of experimental treatment will last until first flatus or bowel movement or 7 days, whichever comes first.</p>                                                                    |
| Outcomes                  | <p>Primary outcome:</p> <ul style="list-style-type: none"> <li>- Time to first flatus and/or bowel movement</li> </ul> <p>Secondary outcomes:</p> <ul style="list-style-type: none"> <li>- Length of hospital stay</li> <li>- Vomiting</li> <li>- Nasogastric tube insertion</li> <li>- Anastomotic leakage</li> <li>- Wound infection</li> <li>- Abscesses</li> </ul> |
| The most update status    | Unknown status of study                                                                                                                                                                                                                                                                                                                                                |
| Trial registration number | ClinicalTrials.gov Identifier: NCT02639728                                                                                                                                                                                                                                                                                                                             |
